# Supplementary material
Source: PubMed Central journal article supplement (PMC2409251)

a

## Spinal Cord

| Nestin-cre | -       | -       | +       | +       |
|------------|---------|---------|---------|---------|
| Nck1       | +/-     | -/-     | +/-     | -/-     |
| Nck2       | flx/flx | flx/flx | flx/flx | flx/flx |

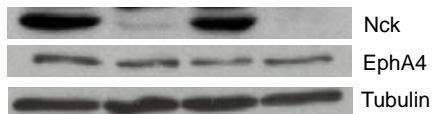

b

## Brain

| Nestin-cre | -       | -       | +       | +       |
|------------|---------|---------|---------|---------|
| Nck1       | +/-     | -/-     | +/-     | -/-     |
| Nck2       | flx/flx | flx/flx | flx/flx | flx/flx |

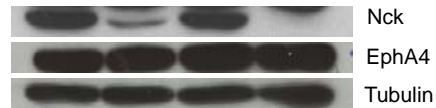

c

ephrinB3 null  
wild type

WB: ephrin  
WB: tubulin

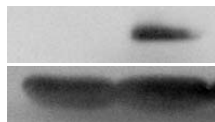

d

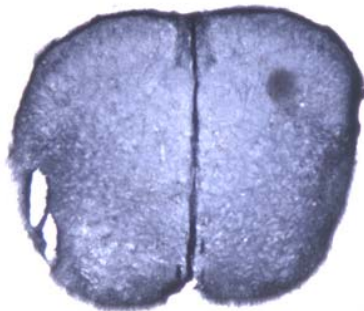

e

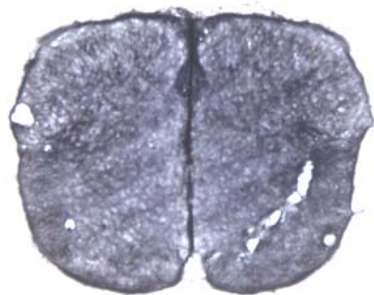

Supplement: pnas_0710316105_2.pdf [file pnas_0710316105_2.pdf]
